# Supplementary material for: Antibiotic Resistance/Susceptibility Profiles of Staphylococcus equorum Strains from Cheese, and Genome Analysis for Antibiotic Resistance Genes
Source: MDPI journal article supplement (doi:10.3390/ijms241411657), 2023-07-19
Supplement: s1 [file s1]

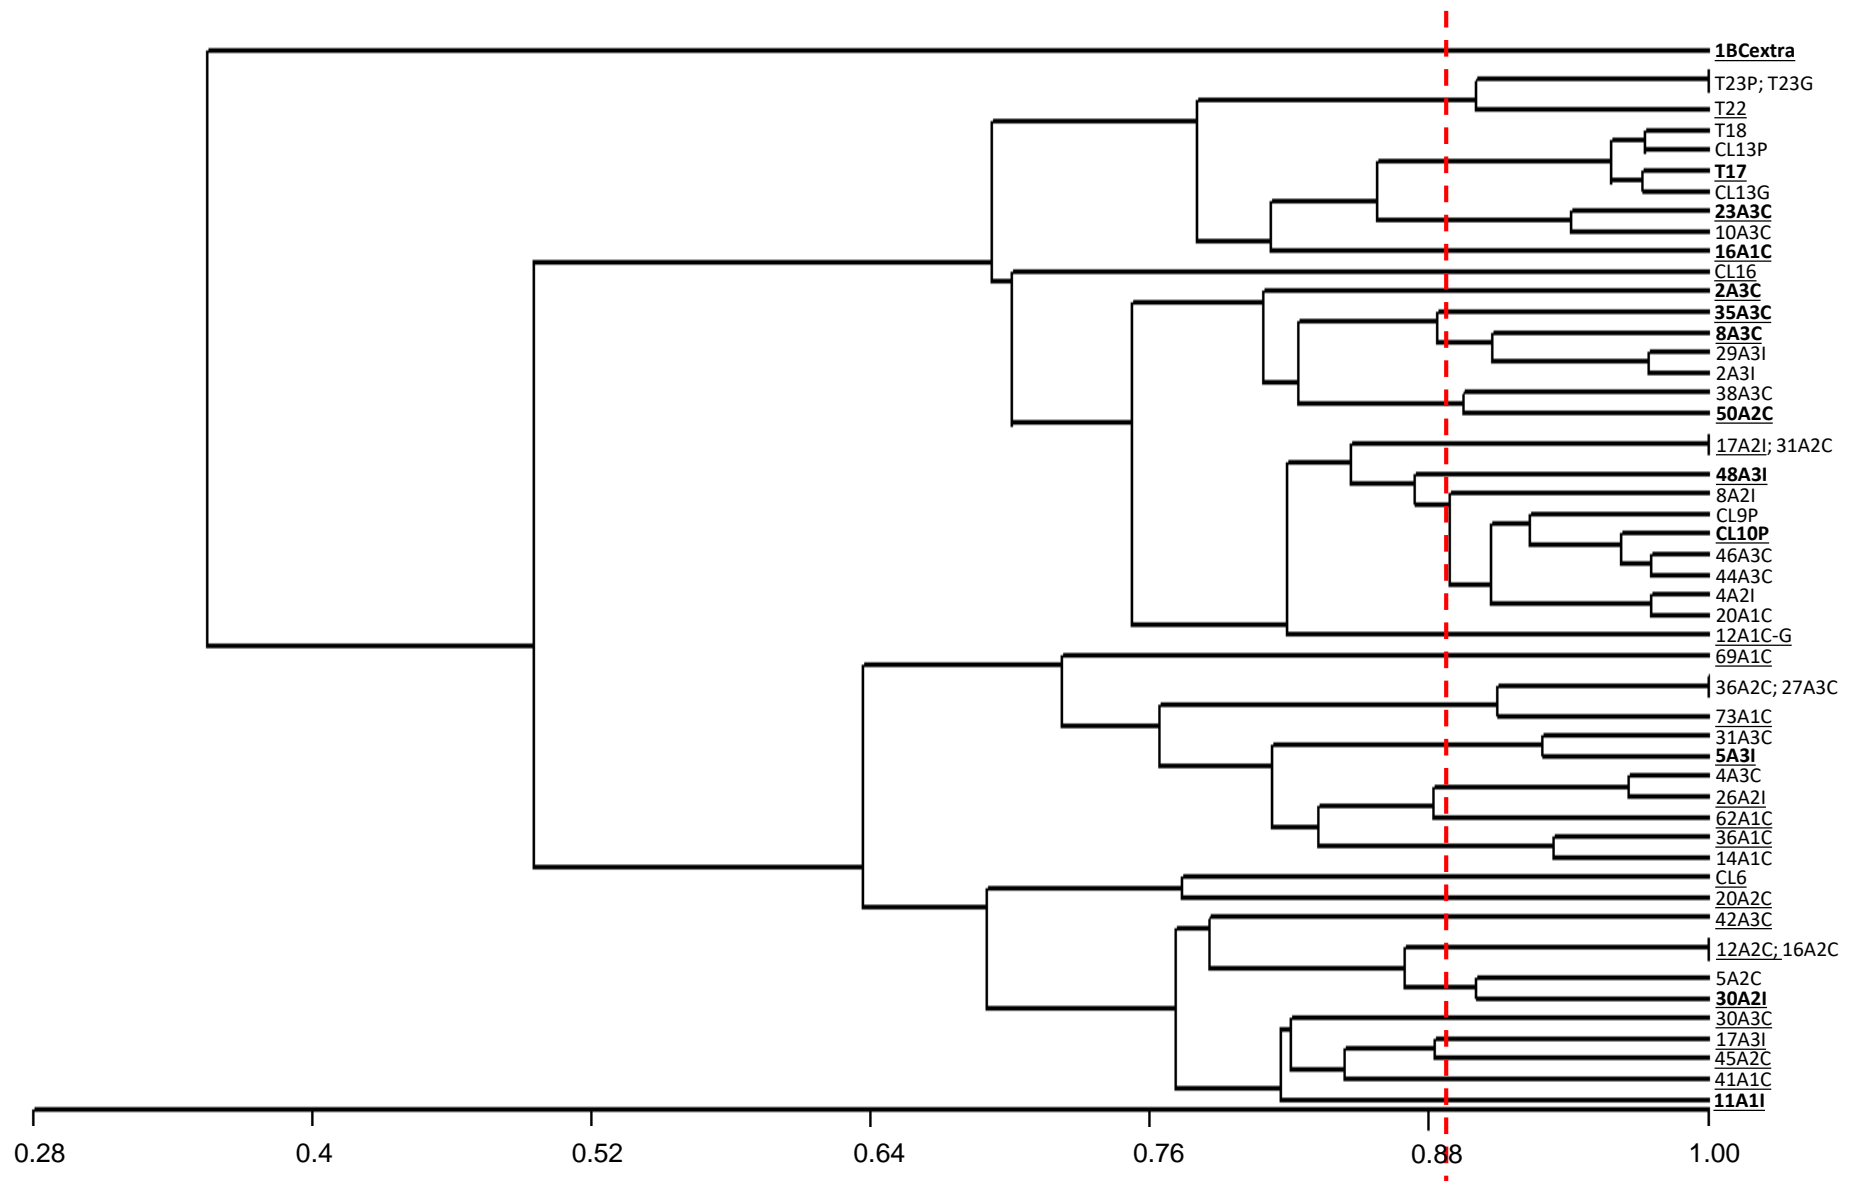

**Figure S1.-** Dendrogram of similarity obtained from the RAPD and rep-PCR typing profiles expressed by the Sorensen's coefficient (in %) for a total of 53 *Staphylococcus equorum* isolates from cheese. Clustering was performed by the unweighted pair group method using arithmetic averages (UPGMA). The dotted red line indicates the 0.90% similarity index considered to select different strains. Underlined strains subjected to antibiotic testing; in bold, sequenced strains.

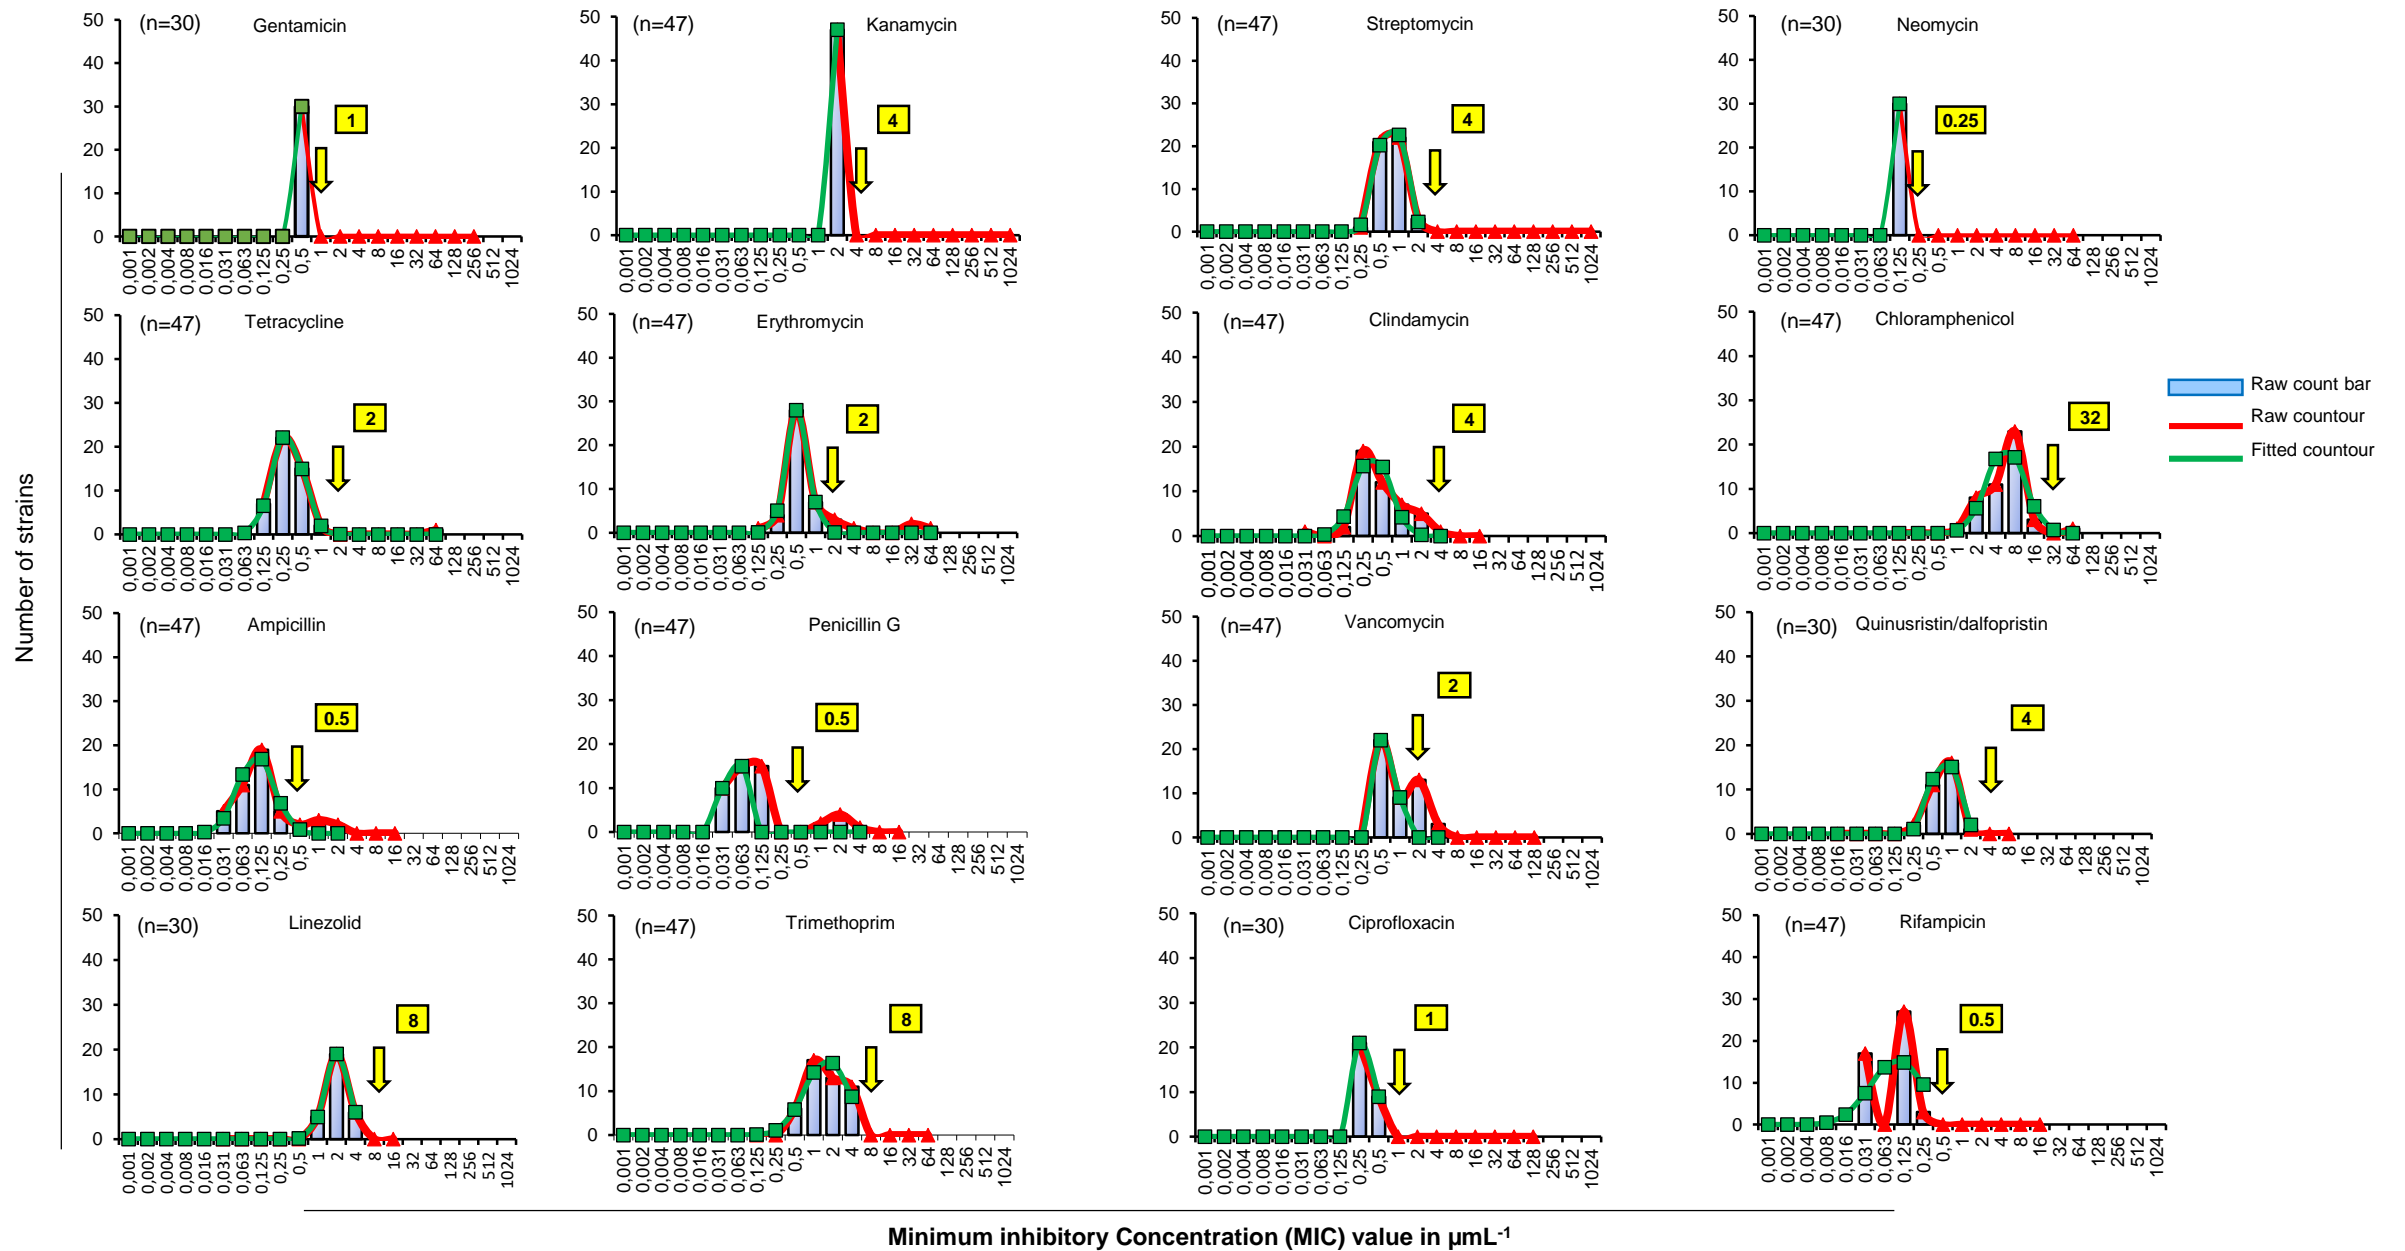

**Figure S2:** Non-linear regression fitting distribution of the MIC values of sixteen antibiotics to *Staphylococcus equorum* strains in this work and the values reported by Marty et al. [18] with ECOFFinder according to Turnidge et al. [43]. The yellow arrows indicate the suggested breaking points proposed in this study to separate susceptible from resistant *S. equorum* cheese strains. For gentamicin, neomycin, quinupristin-dalfopristin, linezolid, and ciprofloxacin only the values of this work were available ( $n=30$ ).

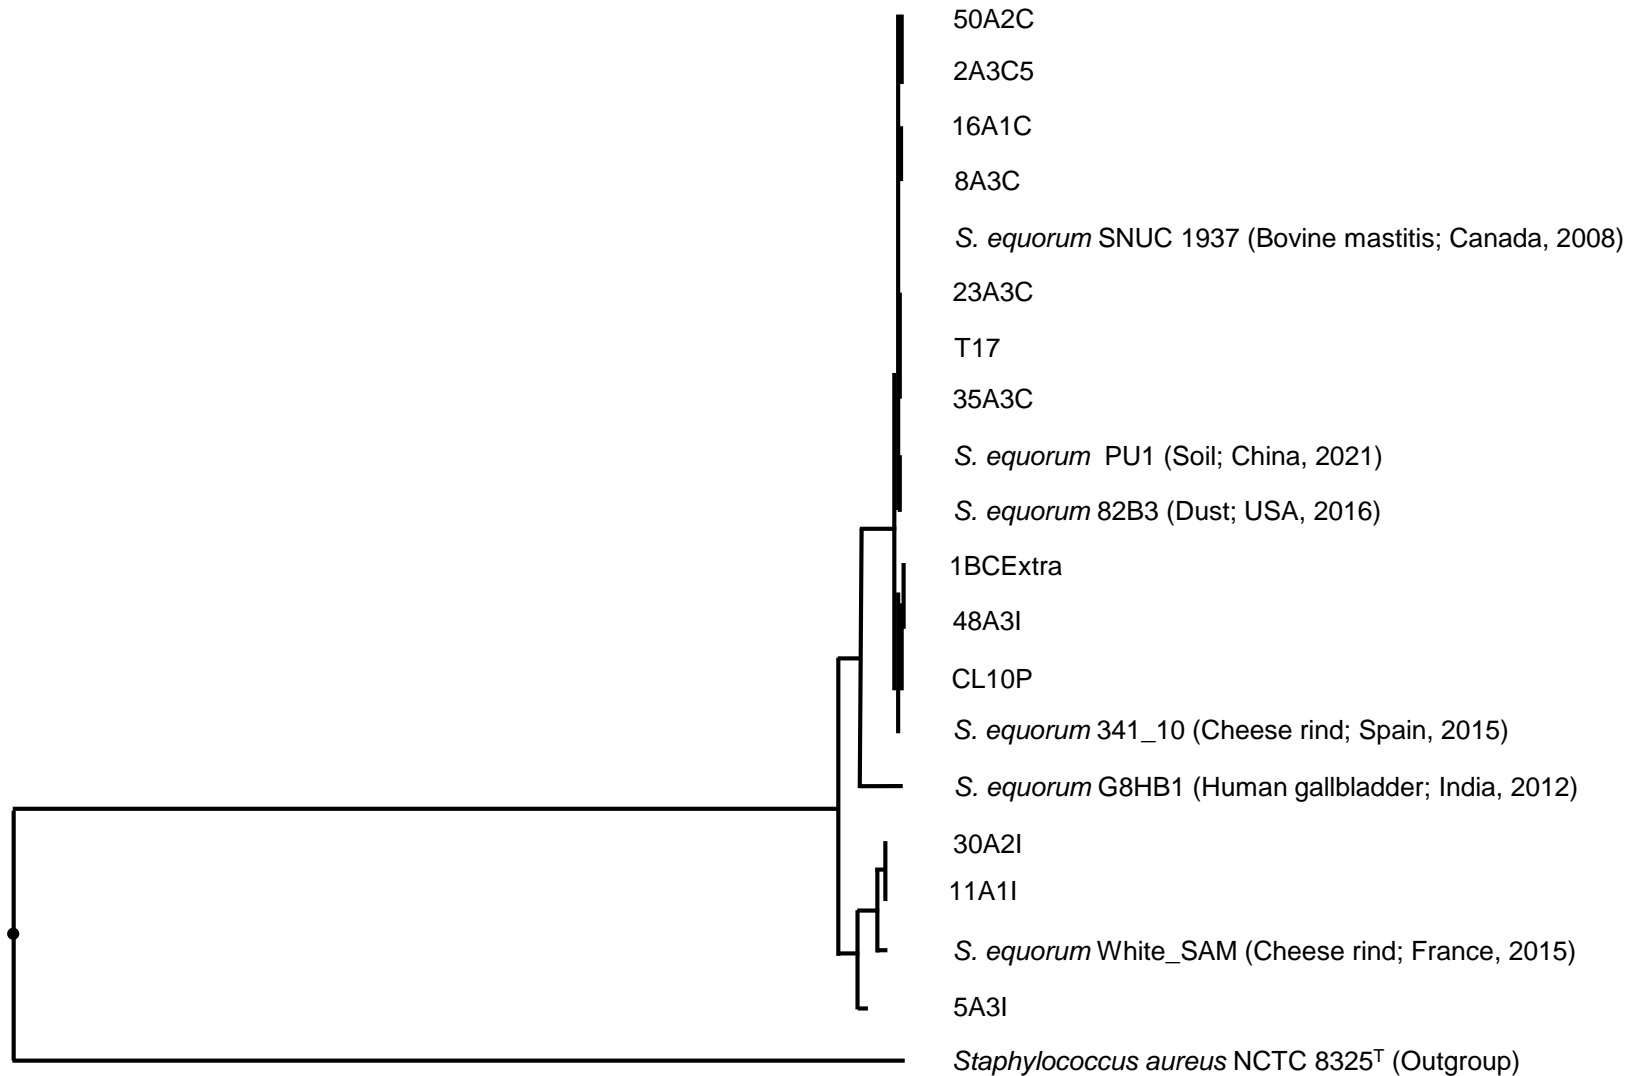

**Figure S3.-** Phylogenomic analysis of the *Staphylococcus equorum* strains from cheese and some others from databases isolated around the globe from different sources and in different periods carried out using 500 genes at the BV-BRC Server (<https://www.bv.brc.org>). The *Staphylococcus aureus* type strain NCTC 8325<sup>T</sup> was used as an outgroup. The tree was rooted at the midpoint.

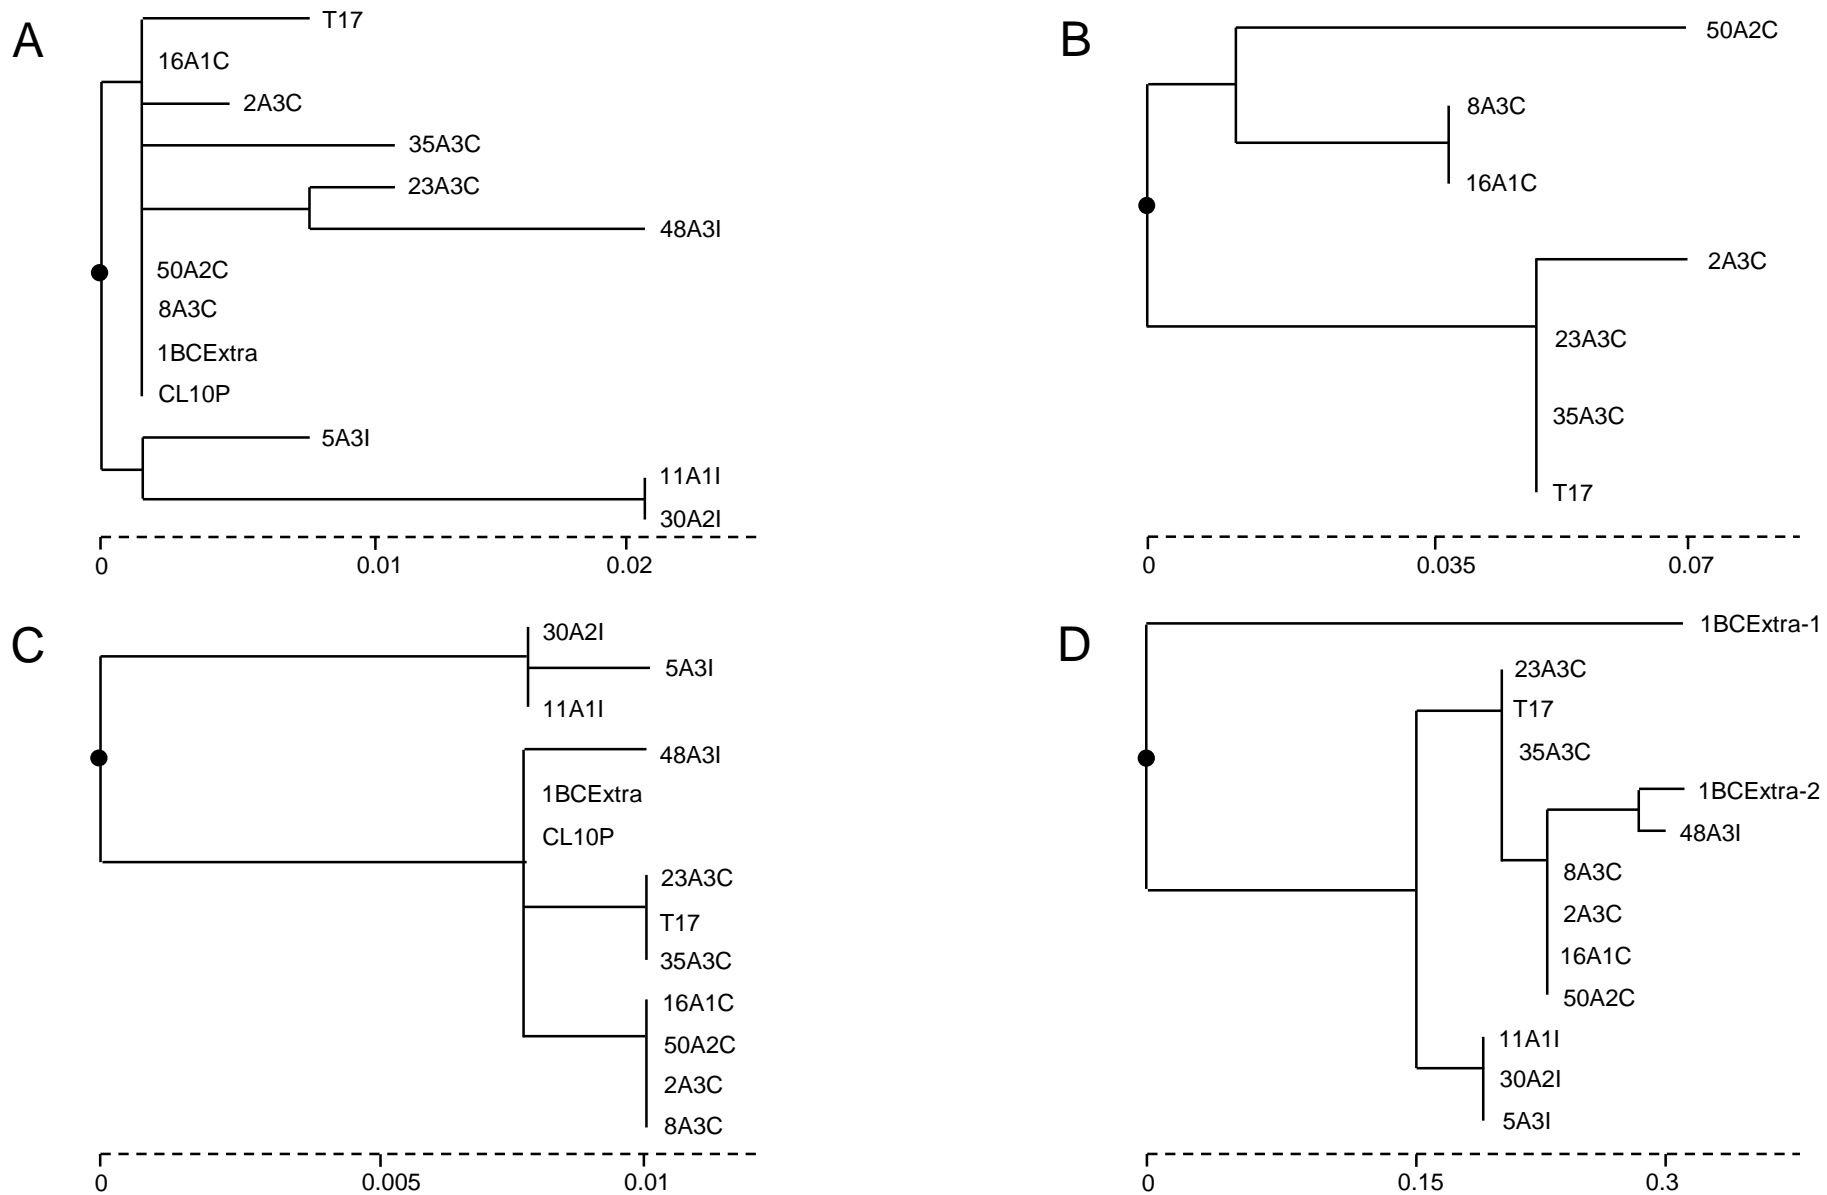

**Figure S4.** Phylogenetic trees of the proteins encoded by the antibiotic resistance genes *bla* (A), *msrA* (B), *norA* (C), and *fosB/fosD* (D). Alignment and phylogenetic reconstructions were performed using the function "build" of ETE3 3.1.2 as implemented on GenomeNet (<https://www.genome.jp/tools/ete/>; accessed on 6 April 2023). ML trees were inferred using PhyML v20160115 ran with model and parameters: -pinv e -alpha e -nclases 4 -o tlr -f m -bootstrap 100.

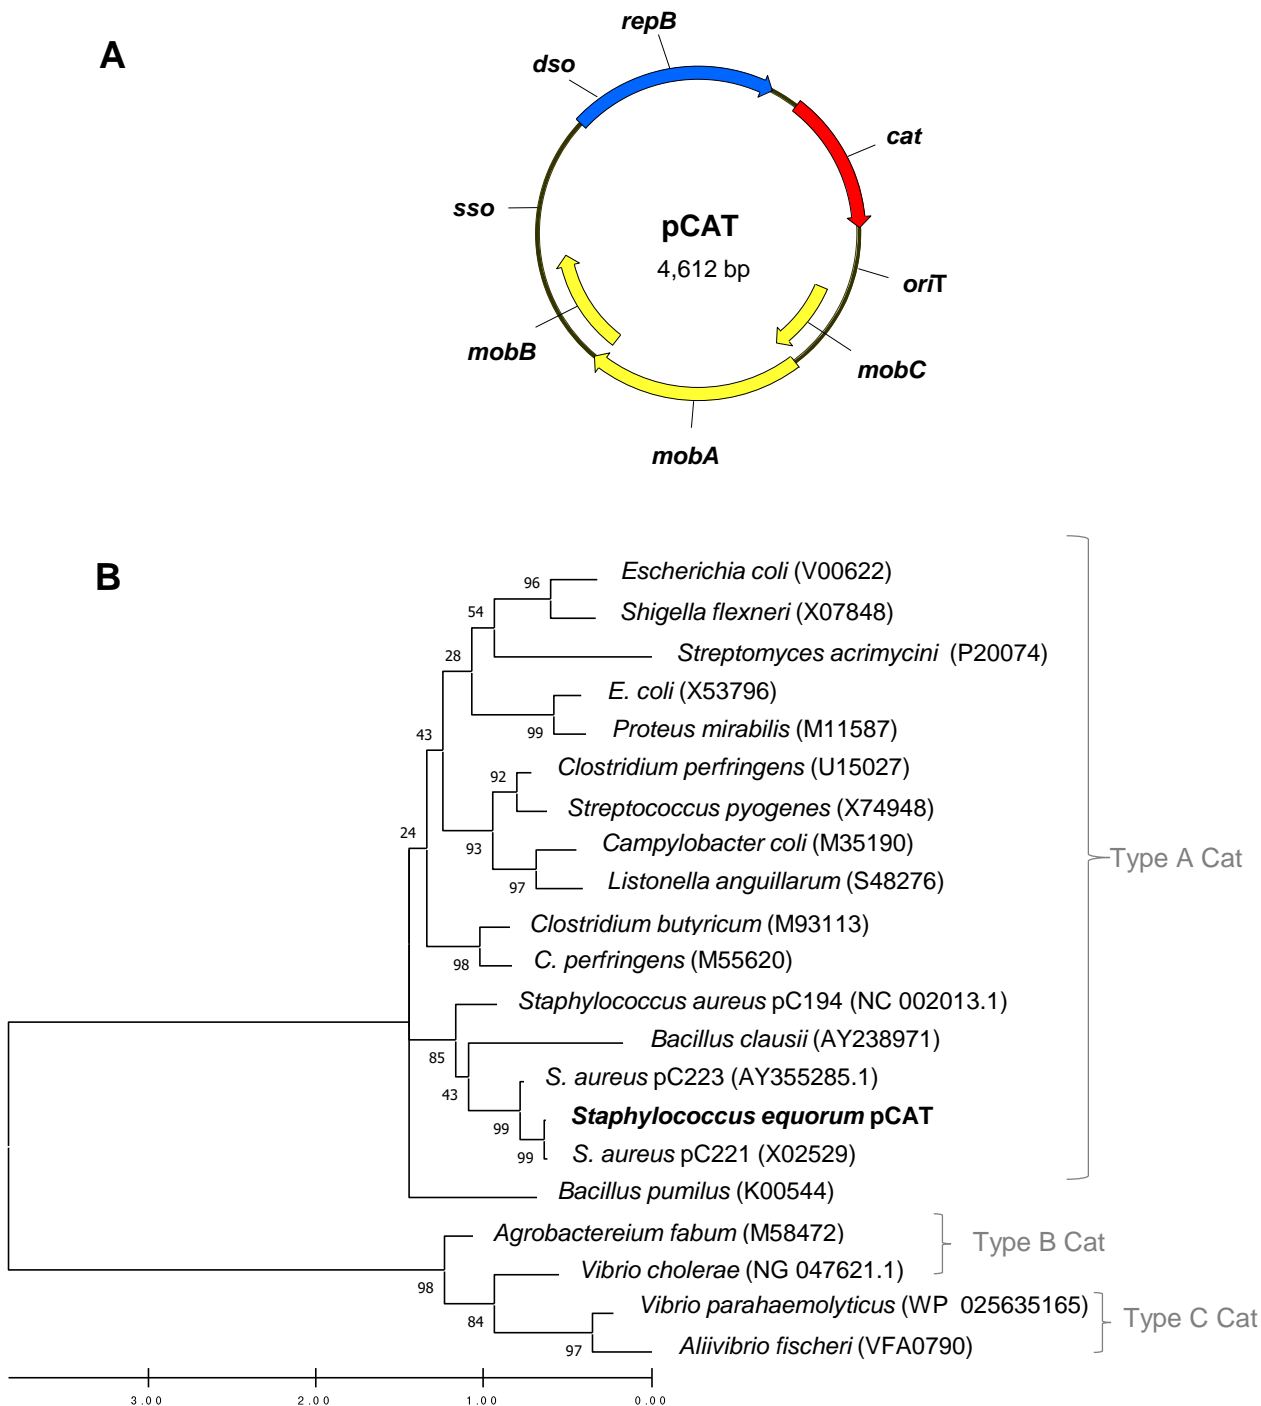

**Figure S5.-** Panel A, genetic map of plasmid pCAT from *S. equorum* 35A3C harbouring the *cat* gene encoding a type A-7 o-chloramphenicol acetyltransferase. Panel B, phylogenetic tree of the Cat protein from pCAT (in bold) and others from databases.

**Table S1.-** Minimum inhibitory concentration (MIC) values of 16 antibiotics to 30 *Staphylococcus equorum* strains isolated from cheese.

| Strain                                             | Antibiotic (MIC $\mu\text{g mL}^{-1}$ ) <sup>a</sup> |     |     |       |       |                 |         |       |                   |                   |       |      |      |       |       |         |
|----------------------------------------------------|------------------------------------------------------|-----|-----|-------|-------|-----------------|---------|-------|-------------------|-------------------|-------|------|------|-------|-------|---------|
|                                                    | Gm                                                   | Km  | Sm  | Nm    | Tc    | Em              | Cli     | Cm    | Am                | PG                | Van   | Q-Da | Lnz  | Tm    | Cip   | Rif     |
| CL6                                                | ≤0.5                                                 | ≤2  | 1   | ≤0.12 | 0.25  | 0.5             | 0.5     | 8     | 0.12              | 0.12              | 0.5   | 0.5  | 2    | 1     | ≤0.25 | ≤0.12   |
| <b>CL10P</b>                                       | ≤0.5                                                 | ≤2  | 1   | ≤0.12 | 0.5   | 0.5             | 1       | 8     | 0.06              | ≤0.03             | 0.5   | 0.5  | 2    | 4     | 0.5   | ≤0.12   |
| CL16                                               | ≤0.5                                                 | ≤2  | 1   | ≤0.12 | 0.5   | 1               | 1       | 8     | 1 <sup>b</sup>    | 2 <sup>b</sup>    | 0.5   | 1    | 2    | 4     | 0.5   | ≤0.12   |
| <b>T17</b>                                         | ≤0.5                                                 | ≤2  | 0.5 | ≤0.12 | 0.5   | 4               | 2       | 16    | 0.12              | 0.12              | 0.5   | 1    | 4    | 2     | ≤0.25 | ≤0.12   |
| T22                                                | ≤0.5                                                 | ≤2  | 0.5 | ≤0.12 | 0.25  | 0.5             | 0.25    | 8     | 0.06              | ≤0.03             | 0.5   | 0.5  | 2    | 4     | ≤0.25 | 0.25    |
| <b>1BCE</b> <b>Extra</b>                           | ≤0.5                                                 | ≤2  | 1   | ≤0.12 | 0.25  | 1               | 0.5     | 8     | ≤0.03             | 0.06              | 0.5   | 0.25 | 2    | 2     | ≤0.25 | ≤0.12   |
| <b>2A3C</b>                                        | ≤0.5                                                 | ≤2  | 1   | ≤0.12 | 0.25  | 2               | 2       | 8     | 0.12              | 0.06              | 0.5   | 1    | 2    | 2     | ≤0.25 | ≤0.12   |
| <b>5A3I</b>                                        | ≤0.5                                                 | ≤2  | 1   | ≤0.12 | 1     | 1               | 2       | 8     | 0.12              | 0.12              | 1     | 1    | 4    | 4     | ≤0.25 | ≤0.12   |
| <b>8A3C</b>                                        | ≤0.5                                                 | ≤2  | 1   | ≤0.12 | 0.5   | 64 <sup>b</sup> | 2       | 8     | 0.06              | 0.12              | 0.5   | 1    | 2    | 2     | ≤0.25 | ≤0.12   |
| <b>11A1I</b>                                       | ≤0.5                                                 | ≤2  | 0.5 | ≤0.12 | 0.5   | 0.5             | 0.12    | 8     | 0.06              | 0.06              | 0.5   | 0.5  | 2    | 1     | 0.5   | ≤0.12   |
| 12A1C-G                                            | ≤0.5                                                 | ≤2  | 1   | ≤0.12 | 0.5   | 0.5             | 1       | 8     | ≤0.03             | 0.06              | 0.5   | 1    | 2    | 2     | ≤0.25 | ≤0.12   |
| 12A2C                                              | ≤0.5                                                 | ≤2  | 0.5 | ≤0.12 | 0.25  | 0.25            | 1       | 4     | 0.38 <sup>b</sup> | 2 <sup>b</sup>    | 0.5   | 1    | 1    | 2     | ≤0.25 | ≤0.12   |
| <b>16A1C</b>                                       | ≤0.5                                                 | ≤2  | 2   | ≤0.12 | 1     | 32 <sup>b</sup> | 2       | 8     | 0.25              | 0.12              | 1     | 1    | 4    | 4     | ≤0.25 | ≤0.12   |
| 17A2I                                              | ≤0.5                                                 | ≤2  | 1   | ≤0.12 | 0.25  | 1               | 0.25    | 8     | 0.12              | 0.12              | 1     | 0.5  | 2    | 4     | ≤0.25 | ≤0.12   |
| 17A3I                                              | ≤0.5                                                 | ≤2  | 0.5 | ≤0.12 | 0.25  | 0.5             | 0.25    | 8     | 0.12              | 0.12              | 0.5   | 0.5  | 2    | 0.5   | 0.5   | ≤0.12   |
| 20A2C                                              | ≤0.5                                                 | ≤2  | 1   | ≤0.12 | 0.25  | 0.5             | 0.25    | 8     | 0.06              | 0.12              | 0.5   | 0.5  | 2    | 1     | 0.5   | ≤0.12   |
| <b>23A3C</b>                                       | ≤0.5                                                 | ≤2  | 1   | ≤0.12 | 0.5   | 2               | 4       | 16    | 0.25              | 0.12              | 1     | 2    | 4    | 4     | ≤0.25 | ≤0.12   |
| 26A2I                                              | ≤0.5                                                 | ≤2  | 0.5 | ≤0.12 | 0.5   | 1               | 0.5     | 8     | 0.75 <sup>b</sup> | 0.75 <sup>b</sup> | 0.5   | 1    | 2    | 1     | ≤0.25 | ≤0.12   |
| <b>30A2I</b>                                       | ≤0.5                                                 | ≤2  | 0.5 | ≤0.12 | 0.25  | 0.25            | 0.12    | 4     | 0.06              | ≤0.03             | 0.5   | 0.5  | 2    | 2     | 0.5   | ≤0.12   |
| 30A3C                                              | ≤0.5                                                 | ≤2  | 0.5 | ≤0.12 | 0.25  | 0.5             | 0.25    | 8     | 0.75 <sup>b</sup> | 1.5 <sup>b</sup>  | 1     | 0.5  | 1    | 1     | 0.5   | ≤0.12   |
| <b>35A3C</b>                                       | ≤0.5                                                 | ≤2  | 0.5 | ≤0.12 | 0.5   | 2               | 0.5     | 64    | ≤0.03             | ≤0.03             | 0.5   | 0.5  | 4    | 1     | ≤0.25 | 0.25    |
| 36A1C                                              | ≤0.5                                                 | ≤2  | 1   | ≤0.12 | 0.5   | 0.5             | 1       | 8     | 0.12              | 0.12              | 1     | 1    | 2    | 4     | ≤0.25 | ≤0.12   |
| 41A1C                                              | ≤0.5                                                 | ≤2  | 0.5 | ≤0.12 | 0.5   | 0.5             | 0.5     | 8     | 0.25              | 0.12              | 1     | 1    | 2    | 1     | ≤0.25 | ≤0.12   |
| 42A3C                                              | ≤0.5                                                 | ≤2  | 0.5 | ≤0.12 | 0.25  | 0.5             | 0.25    | 8     | 1.5 <sup>b</sup>  | 3 <sup>b</sup>    | 0.5   | 0.5  | 1    | 1     | 0.5   | ≤0.12   |
| 45A2C                                              | ≤0.5                                                 | ≤2  | 1   | ≤0.12 | 0.25  | 0.25            | 1       | 4     | 2 <sup>b</sup>    | 1.5 <sup>b</sup>  | 0.5   | 1    | 1    | 1     | ≤0.25 | ≤0.12   |
| <b>48A3I</b>                                       | ≤0.5                                                 | ≤2  | 2   | ≤0.12 | 0.5   | 0.5             | 0.25    | 16    | 0.06              | ≤0.03             | 1     | 0.25 | 2    | 4     | 0.5   | ≤0.12   |
| <b>50A2C</b>                                       | ≤0.5                                                 | ≤2  | 1   | ≤0.12 | 0.25  | 24 <sup>b</sup> | 0.5     | 8     | 0.06              | ≤0.03             | 0.5   | 1    | 1    | 1     | ≤0.25 | ≤0.12   |
| 62A1C                                              | ≤0.5                                                 | ≤2  | 1   | ≤0.12 | 0.5   | 0.5             | 1       | 8     | 0.12              | 0.12              | 1     | 1    | 4    | 4     | ≤0.25 | 0.25    |
| 69A1C                                              | ≤0.5                                                 | ≤2  | 1   | ≤0.12 | 0.25  | 0.5             | 0.25    | 8     | ≤0.03             | ≤0.03             | 0.5   | 1    | 2    | 2     | ≤0.25 | ≤0.12   |
| 73A1C                                              | ≤0.5                                                 | ≤2  | 0.5 | ≤0.12 | 0.5   | 1               | 0.5     | 8     | 0.5 <sup>b</sup>  | 1 <sup>b</sup>    | 0.5   | 1    | 2    | 0.5   | ≤0.25 | ≤0.12   |
| Breakpoints ( $\mu\text{g mL}^{-1}$ ) <sup>c</sup> |                                                      |     |     |       |       |                 |         |       |                   |                   |       |      |      |       |       |         |
| <b>CLSI</b>                                        | R ≥16                                                | (-) | (-) | (-)   | R ≥16 | R ≥8            | R ≥4    | R ≥32 | (-)               | R ≥0.25           | R ≥32 | R ≥4 | R ≥8 | R ≥16 | R ≥4  | R ≥4    |
| <b>EUCAST</b>                                      | R ≥2                                                 | (-) | (-) | (-)   | R ≥1  | R ≥1            | R ≥0.25 | (-)   | (-)               | (-)               | R ≥4  | R ≥1 | R ≥4 | R ≥4  | R ≥1  | R ≥0.06 |

<sup>a</sup>Key of antibiotics: Gm, gentamicin; Km, kanamycin; Sm, streptomycin; Nm, neomycin; Tc, tetracycline; Em, erythromycin; Cli, clindamycin; Cm, chloramphenicol; Am, ampicillin; PG, penicillin G; Van, vancomycin; Q-Da, quinupristin-dalfopristin; Lnz, linezolid; Tm, trimethoprim; Cip, ciprofloxacin; Rif, rifampicin.

<sup>b</sup>MIC values obtained with the MIC Test Strips system (MTS; Liofilchem).

<sup>c</sup>Broth microdilution breakpoints for coagulase negative staphylococci as established by the European Committee on Antimicrobial Susceptibility Testing (EUCAST) [33] and the Clinical and Laboratory Standards Institute for *Staphylococcus* spp. (CLSI) [34]; (-), cut-offs not established. Coloured, strains considered resistant by EUCAST (pink), CLSI (pale blue) or both (red). In bold, strains subject to genome sequencing.

**Supplementary Table 2.-** Genomic Distance Analysis of several *Staphylococcus* species type strains with the sequenced *Staphylococcus equorum* strains of this study. Results from digital DNA-DNA hybridization (dDDH) are shown below the self-comparison diagonal, and results from average nucleotide identity (OrthoANI) are shown above the diagonal.

| ANI<br>dDDH                                     | 11A1I | 16A1C | 30A2I | 50A2C | 5A3I | 48A3I | 2A3C | 8A3C | 23A3C | CL10P | T17  | 1BCExtra | 35A3C | <i>S. equorum</i><br>subsp. <i>equorum</i><br>NCTC 12414 <sup>T</sup> | <i>S. equorum</i><br>subsp. <i>linens</i><br>DSM 15097 <sup>T</sup> | <i>S. urealyticus</i><br>DSM 6718 <sup>T</sup> | <i>S. casei</i> DSM<br>15096 <sup>T</sup> | <i>S. saprophyticus</i><br>ATCC 15305 <sup>T</sup> | <i>S. gallinarum</i> DSM<br>20610 <sup>T</sup> | <i>S. edaphicus</i> CCM<br>8730 <sup>T</sup> | <i>S. nepalensis</i><br>DSM 15150 <sup>T</sup> | <i>S. arlettae</i> NCTC<br>12413 <sup>T</sup> | <i>S. succinus</i> DSM<br>14617 <sup>T</sup> | <i>S. cohnii</i> NCTC<br>11041 <sup>T</sup> | <i>S. xylosus</i> CCM<br>2738 <sup>T</sup> | <i>S. kloosii</i> ATCC<br>43959 <sup>T</sup> | <i>S. pseudoxylus</i><br>S04009 <sup>T</sup> |
|-------------------------------------------------|-------|-------|-------|-------|------|-------|------|------|-------|-------|------|----------|-------|-----------------------------------------------------------------------|---------------------------------------------------------------------|------------------------------------------------|-------------------------------------------|----------------------------------------------------|------------------------------------------------|----------------------------------------------|------------------------------------------------|-----------------------------------------------|----------------------------------------------|---------------------------------------------|--------------------------------------------|----------------------------------------------|----------------------------------------------|
| 11A1I                                           |       | 94.7  | 99.9  | 94.8  | 97.4 | 94.8  | 94.7 | 94.8 | 94.7  | 94.6  | 94.7 | 94.6     | 94.8  | 94.8                                                                  | 94.7                                                                | 78.7                                           | 80.4                                      | 80.2                                               | 77.4                                           | 79.2                                         | 79.2                                           | 76.0                                          | 80.1                                         | 79.1                                        | 79.7                                       | 75.7                                         | 80.2                                         |
| 16A1C                                           | 59.0  |       | 94.7  | 99.4  | 96.1 | 99.0  | 99.4 | 100  | 99.3  | 99.0  | 99.3 | 98.9     | 99.3  | 99.4                                                                  | 99.1                                                                | 78.7                                           | 80.2                                      | 80.0                                               | 77.4                                           | 79.4                                         | 78.9                                           | 75.8                                          | 80.0                                         | 79.0                                        | 79.6                                       | 75.5                                         | 80.0                                         |
| 30A2I                                           | 99.2  | 59.0  |       | 94.7  | 97.4 | 94.8  | 94.8 | 94.8 | 94.7  | 94.6  | 94.6 | 94.5     | 94.9  | 94.8                                                                  | 94.8                                                                | 78.7                                           | 80.4                                      | 80.0                                               | 77.4                                           | 79.1                                         | 78.9                                           | 75.7                                          | 80.1                                         | 79.3                                        | 79.6                                       | 75.7                                         | 80.1                                         |
| 50A2C                                           | 59.4  | 94.9  | 58.8  |       | 96.0 | 98.9  | 99.4 | 99.4 | 99.3  | 99.0  | 99.2 | 98.7     | 99.4  | 99.5                                                                  | 99.0                                                                | 78.6                                           | 80.2                                      | 80.0                                               | 77.4                                           | 79.4                                         | 79.1                                           | 75.7                                          | 80.1                                         | 79.1                                        | 79.7                                       | 75.6                                         | 80.1                                         |
| 5A3I                                            | 77.4  | 66.0  | 77.3  | 66.5  |      | 95.9  | 95.8 | 96.0 | 95.9  | 95.7  | 95.9 | 96.2     | 95.8  | 95.9                                                                  | 96.0                                                                | 78.6                                           | 80.1                                      | 80.3                                               | 77.5                                           | 79.3                                         | 79.1                                           | 75.9                                          | 80.2                                         | 79.2                                        | 79.7                                       | 75.9                                         | 79.9                                         |
| 48A3I                                           | 59.3  | 91.4  | 59.4  | 90.0  | 66.0 |       | 98.9 | 98.9 | 98.9  | 99.3  | 98.9 | 99.3     | 99.0  | 99.0                                                                  | 99.3                                                                | 78.9                                           | 80.4                                      | 80.0                                               | 77.4                                           | 79.5                                         | 79.0                                           | 76.1                                          | 80.0                                         | 79.2                                        | 79.7                                       | 75.8                                         | 80.1                                         |
| 2A3C                                            | 59    | 94.4  | 58.8  | 95.4  | 65.3 | 90.3  |      | 99.3 | 99.4  | 99.1  | 99.5 | 98.9     | 99.5  | 99.4                                                                  | 99.2                                                                | 78.7                                           | 80.2                                      | 79.7                                               | 77.7                                           | 79.4                                         | 78.9                                           | 75.9                                          | 80.1                                         | 79.1                                        | 79.6                                       | 75.7                                         | 80.2                                         |
| 8A3C                                            | 59.1  | 100   | 59.0  | 95.0  | 66.0 | 91.4  | 94.4 |      | 99.3  | 99.0  | 99.3 | 98.4     | 99.4  | 99.4                                                                  | 99.1                                                                | 78.6                                           | 80.0                                      | 79.8                                               | 77.3                                           | 79.3                                         | 78.9                                           | 75.7                                          | 80.1                                         | 78.9                                        | 79.5                                       | 75.6                                         | 79.8                                         |
| 23A3C                                           | 59.1  | 94.0  | 59.0  | 93.6  | 65.5 | 90.4  | 94.7 | 94.0 |       | 99.0  | 99.8 | 98.7     | 99.8  | 99.4                                                                  | 99.0                                                                | 78.7                                           | 80.2                                      | 80.1                                               | 77.5                                           | 79.4                                         | 79.2                                           | 75.9                                          | 80.1                                         | 79.0                                        | 79.8                                       | 75.7                                         | 79.9                                         |
| CL10P                                           | 58.9  | 91.3  | 58.9  | 91.4  | 66.3 | 94.3  | 91.8 | 91.3 | 91.4  |       | 99.0 | 99.2     | 99.0  | 99.0                                                                  | 99.3                                                                | 78.6                                           | 80.2                                      | 79.8                                               | 77.5                                           | 79.4                                         | 79.0                                           | 76.1                                          | 80.0                                         | 78.9                                        | 79.8                                       | 75.7                                         | 80.1                                         |
| T17                                             | 59.1  | 94.2  | 59.3  | 94.1  | 65.7 | 90.8  | 95.2 | 94.2 | 98.6  | 95.1  |      | 98.7     | 99.7  | 99.5                                                                  | 99.0                                                                | 78.8                                           | 80.2                                      | 80.1                                               | 77.4                                           | 79.4                                         | 78.9                                           | 76.0                                          | 80.1                                         | 79.3                                        | 79.6                                       | 75.7                                         | 70.9                                         |
| 1BCExtra                                        | 58.4  | 90.2  | 58.6  | 89.3  | 67.0 | 94.6  | 90.4 | 90.2 | 90.1  | 94.1  | 89.6 |          | 98.9  | 99.0                                                                  | 99.4                                                                | 78.6                                           | 80.1                                      | 79.9                                               | 77.4                                           | 79.5                                         | 78.8                                           | 75.7                                          | 80.0                                         | 79.2                                        | 79.7                                       | 75.7                                         | 80.2                                         |
| 35A3C                                           | 59.5  | 94.7  | 59.5  | 94.9  | 66.0 | 91.1  | 95.7 | 94.7 | 98.6  | 91.6  | 98.7 | 90.3     |       | 99.5                                                                  | 99.2                                                                | 78.6                                           | 80.3                                      | 80.0                                               | 77.3                                           | 79.4                                         | 79.0                                           | 75.9                                          | 80.2                                         | 79.0                                        | 79.6                                       | 75.7                                         | 80.0                                         |
| NCTC 12414 <sup>T</sup>                         | 59.3  | 95.6  | 59.3  | 96.4  | 66.0 | 91.9  | 95.5 | 95.6 | 96.0  | 91.9  | 95.8 | 91.6     | 95.9  |                                                                       | -                                                                   | -                                              | -                                         | -                                                  | -                                              | -                                            | -                                              | -                                             | -                                            | -                                           | -                                          | -                                            | -                                            |
| DSM 15097 <sup>T</sup>                          | 58.8  | 92.3  | 58.8  | 92.7  | 65.5 | 94.2  | 92.6 | 92.3 | 92.2  | 94.0  | 92.2 | 96.0     | 92.6  | -                                                                     |                                                                     | -                                              | -                                         | -                                                  | -                                              | -                                            | -                                              | -                                             | -                                            | -                                           | -                                          | -                                            | -                                            |
| <i>S. urealyticus</i> DSM 6718 <sup>T</sup>     | 22.8  | 22.8  | 22.7  | 22.6  | 22.7 | 22.8  | 22.7 | 22.8 | 22.6  | 22.6  | 22.9 | 22.8     | 22.9  | -                                                                     | -                                                                   |                                                | -                                         | -                                                  | -                                              | -                                            | -                                              | -                                             | -                                            | -                                           | -                                          | -                                            | -                                            |
| <i>S. casei</i> DSM 15096 <sup>T</sup>          | 24.3  | 23.7  | 24.2  | 23.8  | 24.1 | 24.0  | 24.1 | 23.7 | 23.7  | 23.7  | 23.8 | 24.0     | 24.0  | -                                                                     | -                                                                   | -                                              |                                           | -                                                  | -                                              | -                                            | -                                              | -                                             | -                                            | -                                           | -                                          | -                                            | -                                            |
| <i>S. saprophyticus</i> ATCC 15305 <sup>T</sup> | 24.1  | 23.3  | 23.9  | 23.6  | 24.1 | 23.5  | 23.4 | 23.3 | 23.7  | 23.4  | 23.5 | 23.3     | 23.5  | -                                                                     | -                                                                   | -                                              | -                                         |                                                    | -                                              | -                                            | -                                              | -                                             | -                                            | -                                           | -                                          | -                                            | -                                            |
| <i>S. gallinarum</i> DSM 20610 <sup>T</sup>     | 21.5  | 21.4  | 21.4  | 21.5  | 21.5 | 21.6  | 21.8 | 21.4 | 21.5  | 21.7  | 21.5 | 21.6     | 21.5  | -                                                                     | -                                                                   | -                                              | -                                         | -                                                  |                                                | -                                            | -                                              | -                                             | -                                            | -                                           | -                                          | -                                            | -                                            |
| <i>S. edaphicus</i> CCM 8730 <sup>T</sup>       | 22.8  | 22.7  | 22.8  | 22.8  | 22.9 | 22.7  | 22.8 | 22.7 | 22.7  | 22.7  | 22.8 | 22.8     | 22.7  | -                                                                     | -                                                                   | -                                              | -                                         | -                                                  | -                                              |                                              | -                                              | -                                             | -                                            | -                                           | -                                          | -                                            | -                                            |
| <i>S. nepalensis</i> DSM 15150 <sup>T</sup>     | 22.8  | 22.6  | 22.9  | 22.7  | 23.0 | 22.7  | 22.7 | 22.6 | 22.7  | 22.6  | 22.7 | 22.7     | 22.7  | -                                                                     | -                                                                   | -                                              | -                                         | -                                                  | -                                              | -                                            |                                                | -                                             | -                                            | -                                           | -                                          | -                                            | -                                            |
| <i>S. arlettae</i> NCTC 12413 <sup>T</sup>      | 20.9  | 20.4  | 20.8  | 20.8  | 21.1 | 20.9  | 20.9 | 20.4 | 20.5  | 20.9  | 20.6 | 20.7     | 20.6  | -                                                                     | -                                                                   | -                                              | -                                         | -                                                  | -                                              | -                                            | -                                              |                                               | -                                            | -                                           | -                                          | -                                            | -                                            |
| <i>S. succinus</i> DSM 14617 <sup>T</sup>       | 23.6  | 23.3  | 23.5  | 23.4  | 23.4 | 23.3  | 23.4 | 23.3 | 23.5  | 23.6  | 23.5 | 23.4     | 23.5  | -                                                                     | -                                                                   | -                                              | -                                         | -                                                  | -                                              | -                                            | -                                              | -                                             |                                              | -                                           | -                                          | -                                            | -                                            |
| <i>S. cohnii</i> NCTC 11041 <sup>T</sup>        | 22.8  | 22.6  | 23.0  | 22.8  | 22.9 | 22.6  | 22.9 | 22.6 | 22.7  | 22.5  | 22.8 | 22.8     | 22.8  | -                                                                     | -                                                                   | -                                              | -                                         | -                                                  | -                                              | -                                            | -                                              | -                                             | -                                            |                                             | -                                          | -                                            | -                                            |
| <i>S. xylosus</i> CCM 2738 <sup>T</sup>         | 23.3  | 23.2  | 23.2  | 23.4  | 23.4 | 23.2  | 23.4 | 23.2 | 23.2  | 23.3  | 23.3 | 23.2     | 23.3  | -                                                                     | -                                                                   | -                                              | -                                         | -                                                  | -                                              | -                                            | -                                              | -                                             | -                                            | -                                           |                                            | -                                            | -                                            |
| <i>S. kloosii</i> ATCC 43959 <sup>T</sup>       | 20.5  | 20.2  | 20.5  | 20.2  | 20.4 | 20.3  | 20.3 | 20.2 | 20.3  | 20.3  | 20.4 | 20.4     | 20.4  | -                                                                     | -                                                                   | -                                              | -                                         | -                                                  | -                                              | -                                            | -                                              | -                                             | -                                            | -                                           | -                                          |                                              | -                                            |
| <i>S. pseudoxylus</i> S04009 <sup>T</sup>       | 23.4  | 23.4  | 23.4  | 23.4  | 23.5 | 23.4  | 23.5 | 23.4 | 23.4  | 23.6  | 23.4 | 23.4     | 23.4  | -                                                                     | -                                                                   | -                                              | -                                         | -                                                  | -                                              | -                                            | -                                              | -                                             | -                                            | -                                           | -                                          | -                                            |                                              |

dDDH formula d4 (a.k.a. GGDC formula 2): sum of all identities found in HSPs divided by overall HSP length [67]. OrthoANI was calculated using the OrthoANLu algorithm, an improved iteration of the original algorithm and using USEARCH instead of BLAST [68]. Coloured boxes show the highest dDDH, and OrthoANI with the *S. equorum* type strains that are higher (orange and green) or lower (pale blue) than currently accepted thresholds for the species level (>70% and >95%, respectively). -, not done. In bold, dDDH and OrthoANI values for the strains sequenced in this work and the two *S. equorum* subspecies type strains: *S. equorum* subsp. *equorum* NCTC 12414<sup>T</sup> and *S. equorum* subsp. *linens* DSM 15097<sup>T</sup>.

## References

18. Marty, E.; Bodenmann, C.; Buchs, J.; Hadorn, R.; Eugster-Meier, E.; Lacroix, C.; Meile, L. Prevalence of antibiotic resistance in coagulase-negative staphylococci from spontaneously fermented meat products and safety assessment for new starters. *Int. J. Food Microbiol.* **2012**, *159*, 74-83. doi: 10.1016/j.ijfoodmicro.2012.07.025.
33. EUCAST. Breakpoint tables for interpretation of MICs and zone diameters. Version 13.0, valid from 2023-01-01. [https://www.eucast.org/clinical\\_breakpoints/](https://www.eucast.org/clinical_breakpoints/), **2023**.
34. CLSI. Performance standards for antimicrobial susceptibility testing, 33rd ed. CLSI supplement M100. Clinical and Laboratory Standards Institute; **2023**.
43. Turnidge, J.; Kahlmeter, G.; Kronvall, G. Statistical characterisation of bacterial wild-type MIC value distributions and the determination of epidemiological cut-off values. *Clin. Microbiol. Infect.* **2006**, *12*, 418-25. doi: 10.1111/j.1469-0691.2006.01377.x.
67. Meier-Kolthoff, J.P.; Göker, M. TYGS is an automated high-throughput platform for state-of-the-art genome-based taxonomy. *Nat. Commun.* **2019**, *10*, 2182. doi: 10.1038/s41467-019-10210-3.
68. Yoon, S.H.; Ha, S.M.; Lim, J.M.; Kwon, S.J.; Chun, J. A large-scale evaluation of algorithms to calculate average nucleotide identity. *Antonie van Leeuwenhoek* **2017**, *110*, 1281-1286. doi: 10.1007/s10482-017-0844-4.
